# Supplementary material for: Self-healing and stretchable conductor based on embedded liquid metal patterns within imprintable dynamic covalent elastomer
Source: Royal Society of Chemistry journal article supplement (doi:10.1039/d1tc05087g), 2021-12-09
Supplement: d1tc05087g1.pdf [file d1tc05087g1.pdf]

## Electronic supplementary information (ESI)

### Self-healing and stretchable conductor based on embedded liquid metal patterns within imprintable dynamic covalent elastomer

Xiaoliang Chen, Peng Sun, Hongmiao Tian, Xiangming Li, Chunhui Wang, Jiankang Duan, Yongsong Luo, Sheng Li, Xiaoming Chen, Jinyou Shao\*

State Key Laboratory for Manufacturing Systems Engineering, Xi'an Jiaotong University, Xi'an, Shaanxi 710049, China. Email: jyshao@mail.xjtu.edu.cn

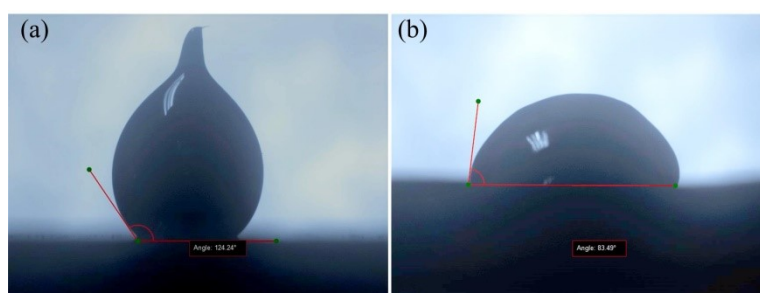

Figure S1. The contact angles of LM on regular PDMS (a) and on the self-healing PDMS (b).

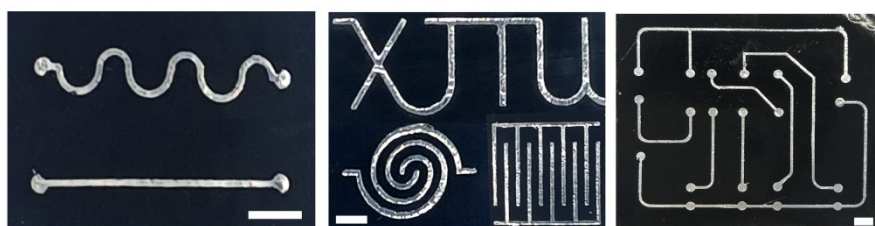

Figure S2. Photographs of self-healing conductors with patterns of LM embedded in elastomer to form lines, letters, two entangled spirals, interdigital electrode and circuit patterns. Scale bar: 5mm.

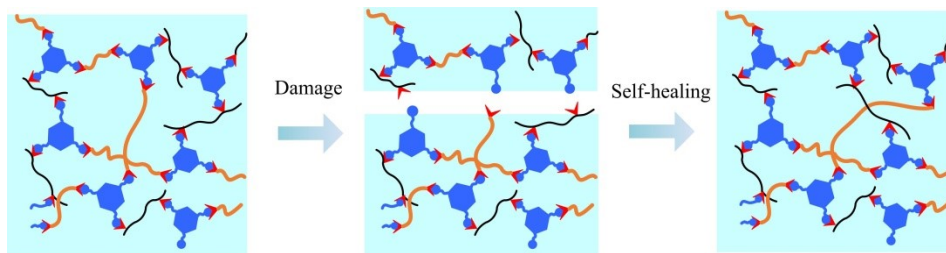

Figure S3. Schematic illustration of the dynamic covalent imine bond during self-healing.

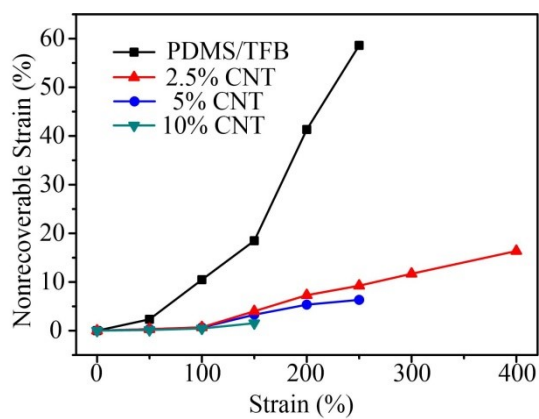

Figure S4. Irreversible residual strain of the self-healing PDMS/MWCNT film under different strains.

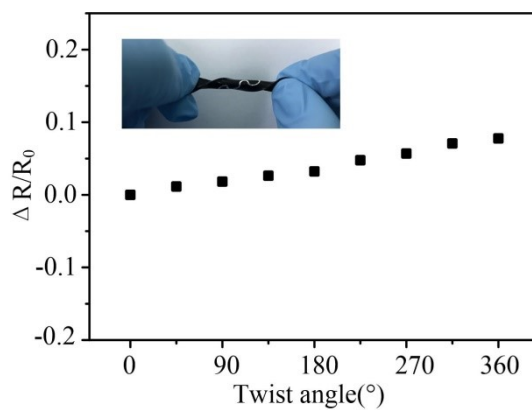

Figure S5. Relative resistance change of the self-healing conductor under different twist angle

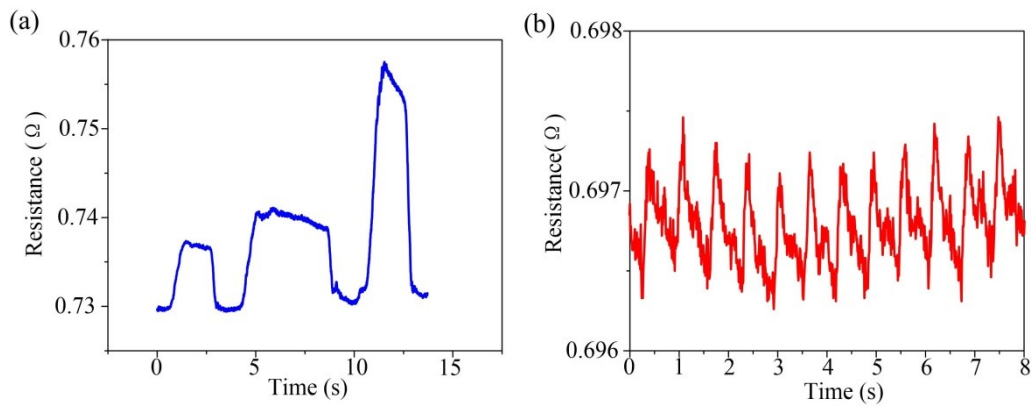

Figure S6. The resistive strain sensor was used for physiological monitoring: (a) arm movement, and (b) heart beating.

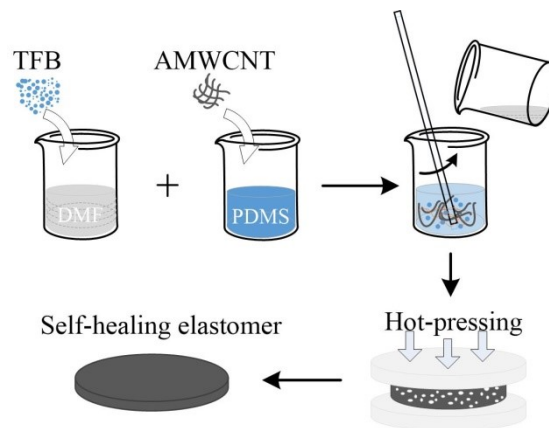

Figure S7. Schematic of synthesis of the self-healed elastomer.
